# Supplementary material for: Development and validation of a metastasis-associated prognostic signature based on single-cell RNA-seq in clear cell renal cell carcinoma
Source: Aging (Albany NY). 2019 Nov 20;11(22):10183–202. doi: 10.18632/aging.102434 (PMC6914399; doi:10.18632/aging.102434)
Supplement: Supplementary Table 1 [file aging-11-102434-s002..xls]

## Sheet: 06.tsneCluster
Supplementary Table 1. Cluster classification of 121 samples from the TSNE algorithm.
metastasisPDX_1	0
metastasisPDX_2	0
metastasisPDX_3	0
metastasisPDX_4	0
metastasisPDX_5	0
metastasisPDX_6	0
metastasisPDX_7	0
metastasisPDX_8	0
metastasisPDX_9	0
metastasisPDX_10	0
metastasisPDX_11	0
metastasisPDX_12	0
metastasisPDX_13	0
metastasisPDX_14	0
metastasisPDX_15	0
metastasisPDX_16	0
metastasisPDX_17	0
metastasisPDX_18	0
metastasisPDX_19	0
metastasisPDX_20	0
metastasisPDX_21	0
metastasisPDX_22	0
metastasisPDX_23	0
metastasisPDX_24	0
metastasisPDX_25	0
metastasisPDX_26	0
metastasisPDX_27	0
metastasisPDX_28	0
metastasisPDX_29	0
metastasisPDX_30	0
metastasisPDX_31	0
metastasisPDX_32	0
metastasisPDX_33	0
metastasisPDX_34	0
metastasisPDX_35	0
metastasisPDX_36	0
metastasisPDX_37	0
primaryPDX_31	0
patientmRCC_1	0
patientmRCC_2	0
patientmRCC_3	0
patientmRCC_4	0
patientmRCC_5	0
patientmRCC_6	0
patientmRCC_7	0
patientmRCC_8	0
patientmRCC_9	0
patientmRCC_10	0
patientmRCC_11	0
patientmRCC_12	0
patientmRCC_13	0
patientmRCC_14	0
patientmRCC_15	0
patientmRCC_16	0
patientmRCC_17	0
patientmRCC_18	0
patientmRCC_19	0
patientmRCC_20	0
patientmRCC_21	0
patientmRCC_22	0
patientmRCC_23	0
patientmRCC_24	0
patientmRCC_25	0
patientmRCC_26	0
patientmRCC_27	0
patientmRCC_28	0
patientmRCC_29	0
patientmRCC_30	0
patientmRCC_31	0
patientmRCC_32	0
patientmRCC_33	0
patientmRCC_34	0
patientmRCC_35	0
patientmRCC_36	0
primaryPDX_1	1
primaryPDX_2	1
primaryPDX_3	1
primaryPDX_4	1
primaryPDX_5	1
primaryPDX_6	1
primaryPDX_7	1
primaryPDX_8	1
primaryPDX_9	1
primaryPDX_10	1
primaryPDX_11	1
primaryPDX_12	1
primaryPDX_13	1
primaryPDX_14	1
primaryPDX_15	1
primaryPDX_16	1
primaryPDX_17	1
primaryPDX_18	1
primaryPDX_19	1
primaryPDX_20	1
primaryPDX_21	1
primaryPDX_22	1
primaryPDX_23	1
primaryPDX_24	1
primaryPDX_25	1
primaryPDX_26	1
primaryPDX_27	1
primaryPDX_28	1
primaryPDX_29	1
primaryPDX_30	1
primaryPDX_32	1
primaryPDX_33	1
primaryPDX_34	1
primaryPDX_35	1
primaryPDX_36	1
primaryPDX_37	1
primaryPDX_38	1
primaryPDX_39	1
primaryPDX_40	1
primaryPDX_41	1
primaryPDX_42	1
primaryPDX_43	1
primaryPDX_44	1
primaryPDX_45	1
primaryPDX_46	1
primaryPDX_47	1
primaryPDX_48	1
