# Supplementary material for: Development and validation of a metastasis-associated prognostic signature based on single-cell RNA-seq in clear cell renal cell carcinoma
Source: Aging (Albany NY). 2019 Nov 20;11(22):10183–202. doi: 10.18632/aging.102434 (PMC6914399; doi:10.18632/aging.102434)
Supplement: Supplementary Table 2 [file aging-11-102434-s005..xls]

## Sheet: 06.markers
Supplementary Table 2. Identification of marker genes between primary and metastasis tumors from the cluster analysis.
p_val	avg_logFC	pct.1	pct.2	p_val_adj	cluster	gene
5.71616e-20	-1.73338	0.986	1	1.04589e-15	0	NME7
8.68713e-20	-1.63157	0.095	0.894	1.58948e-15	0	DEFB1
2.99879e-19	2.34976	1	0.979	5.48688e-15	0	MT2A
3.93824e-19	-2.08434	0.203	0.957	7.2058e-15	0	TCN1
3.27625e-18	-1.85179	0.554	0.979	5.99456e-14	0	CLU
3.55477e-18	1.40621	0.959	0.255	6.50417e-14	0	MT1L
9.01568e-18	-1.02397	1	1	1.6496e-13	0	HLA-B
1.08699e-17	-0.998846	0.203	0.915	1.98886e-13	0	GSTA2
1.67113e-17	-1.34027	0.392	0.957	3.05767e-13	0	AC005726.4
5.87311e-17	-1.0235	0.419	0.957	1.0746e-12	0	CRYM
1.31617e-16	-1.02907	1	1	2.40819e-12	0	NDUFA5
3.80768e-16	-1.39514	0.959	1	6.96691e-12	0	CD74
4.07751e-16	-1.25269	0.811	0.979	7.46062e-12	0	ALDH1A1
4.15727e-16	-0.747029	0.973	0.979	7.60655e-12	0	CTSD
4.55161e-16	-1.4037	0.743	0.979	8.32807e-12	0	HMGN3
5.29555e-16	-0.825592	0.554	0.979	9.68926e-12	0	ST3GAL5
5.43046e-16	-0.94205	0.459	0.979	9.93612e-12	0	MPZL2
9.0876e-16	-0.572205	0.784	0.979	1.66276e-11	0	DPYSL3
1.00736e-15	1.60005	0.986	0.851	1.84316e-11	0	CXCL1
1.15418e-15	-0.711271	0.459	0.979	2.11181e-11	0	SULF2
2.25527e-15	-0.789037	1	1	4.12646e-11	0	NDUFB2
2.44504e-15	-1.23808	0.703	0.979	4.47369e-11	0	PDK4
2.91418e-15	-0.748021	1	0.979	5.33208e-11	0	NDUFS5
3.10621e-15	-0.769737	0.986	0.979	5.68344e-11	0	ABLIM1
3.44244e-15	-1.22391	0.919	1	6.29862e-11	0	TSC22D1
4.27245e-15	-1.02942	0.986	1	7.81731e-11	0	BHLHE41
5.39128e-15	-0.742447	0.986	0.979	9.86442e-11	0	JUND
6.54342e-15	-0.890747	0.878	0.979	1.19725e-10	0	SPOCK1
6.65652e-15	-1.07134	0.986	0.979	1.21794e-10	0	HEXB
9.51136e-15	-1.29615	1	1	1.74029e-10	0	NNMT
1.45502e-14	-0.517094	0.257	0.872	2.66225e-10	0	PRUNE2
1.50477e-14	-0.774107	1	1	2.75327e-10	0	AC006064.4
1.57572e-14	-0.934908	0.838	0.979	2.8831e-10	0	AC005921.2
1.85158e-14	-1.21909	1	1	3.38784e-10	0	SPP1
1.8884e-14	-1.02594	0.959	0.979	3.45521e-10	0	BNIP3
1.96998e-14	-0.836673	0.986	0.979	3.60447e-10	0	TGFA
2.08446e-14	-1.10932	0.905	1	3.81394e-10	0	SYTL2
2.0954e-14	-0.88881	0.959	1	3.83395e-10	0	ATP5IF1
2.09624e-14	-0.820315	1	0.979	3.8355e-10	0	COX7C
2.27674e-14	-0.887494	1	1	4.16576e-10	0	PDZK1IP1
3.17776e-14	-0.73311	0.878	0.979	5.81435e-10	0	PPM1H
3.81396e-14	0.760959	0.838	0.085	6.97841e-10	0	SFTA1P
4.58045e-14	-0.650838	0.257	0.872	8.38085e-10	0	HPD
5.83715e-14	-0.502074	0.959	1	1.06802e-09	0	ANKRD40
5.86561e-14	-0.653979	0.351	0.936	1.07323e-09	0	USH1C
6.58283e-14	-1.11509	0.946	0.979	1.20446e-09	0	CDA
6.86842e-14	-0.627323	1	1	1.25672e-09	0	S100A10
1.1146e-13	-0.657018	0.973	1	2.03938e-09	0	CYP51A1
1.5904e-13	-1.22298	0.73	1	2.90996e-09	0	HGD
1.59862e-13	-0.865438	1	1	2.92499e-09	0	VDAC1
1.70983e-13	-1.33254	0.797	1	3.12848e-09	0	WSB1
1.99949e-13	-0.816005	0.892	0.957	3.65847e-09	0	OPN3
2.12426e-13	-1.04522	0.527	0.957	3.88676e-09	0	CD24P4
2.6332e-13	-0.72699	0.432	0.957	4.81796e-09	0	CCDC198
2.73368e-13	-0.616315	0.986	0.979	5.00182e-09	0	COX7B
3.00242e-13	-0.606162	0.919	0.979	5.49353e-09	0	RASGRP1
3.20166e-13	-0.970897	0.986	0.979	5.85808e-09	0	TNFSF10
3.59984e-13	-0.569747	0.257	0.894	6.58663e-09	0	AKR1C3
3.97254e-13	-0.851479	0.946	1	7.26855e-09	0	RNF19A
4.13545e-13	-0.648834	0.986	1	7.56663e-09	0	CAMK2N1
4.13545e-13	-0.816886	1	1	7.56663e-09	0	NAP1L1
4.836e-13	-0.681098	0.973	0.979	8.84843e-09	0	NDRG1
5.25629e-13	0.796307	0.986	0.809	9.61743e-09	0	MT1E
6.35899e-13	-0.533881	1	0.979	1.1635e-08	0	LIMCH1
6.35899e-13	-0.81499	1	1	1.1635e-08	0	GAPDH
7.39298e-13	-0.808639	0.419	0.957	1.35269e-08	0	SSBP2
9.00938e-13	-0.729651	0.73	1	1.64845e-08	0	RNF130
9.19515e-13	-0.959238	0.986	0.979	1.68244e-08	0	ISG20
9.47095e-13	-0.80793	0.689	0.979	1.7329e-08	0	CPM
1.27464e-12	-0.602002	0.797	0.979	2.33221e-08	0	PROS1
1.32653e-12	0.81746	1	0.979	2.42715e-08	0	GSTO1
1.32653e-12	-0.797516	1	0.979	2.42715e-08	0	P4HA1
1.36322e-12	-0.952447	0.5	0.979	2.49428e-08	0	ALDOC
1.43244e-12	-0.795284	1	1	2.62094e-08	0	ATP5F1C
1.60704e-12	-0.948131	0.986	1	2.94041e-08	0	PON2
1.73546e-12	1.58734	1	0.574	3.17536e-08	0	IL6
1.80247e-12	-0.808776	0.986	1	3.29798e-08	0	SLC41A2
1.94552e-12	1.59174	1	1	3.55972e-08	0	MT-ND4
2.58789e-12	-0.801407	0.986	0.979	4.73507e-08	0	P4HB
3.70689e-12	-0.732357	0.986	1	6.7825e-08	0	NDUFC1
4.15007e-12	-0.531996	1	1	7.59338e-08	0	UQCR10
5.19739e-12	0.626492	1	0.957	9.50966e-08	0	TMA7
5.19781e-12	-0.611664	1	0.979	9.51044e-08	0	HINT1
6.22274e-12	-0.862761	0.892	1	1.13857e-07	0	RF00100
6.26557e-12	-0.652514	1	0.979	1.14641e-07	0	DBI
6.53738e-12	-0.525181	0.878	0.979	1.19614e-07	0	MALL
7.04299e-12	-1.06774	0.878	0.979	1.28866e-07	0	TMCC1
7.88032e-12	-0.741659	0.581	0.936	1.44186e-07	0	RETREG1
1.19766e-11	-0.650261	0.5	0.957	2.19136e-07	0	2019-03-03
1.28126e-11	-0.629506	0.905	0.979	2.34432e-07	0	FAM162A
1.47726e-11	0.779088	0.932	0.553	2.70294e-07	0	IFITM2
1.52138e-11	-0.885569	1	1	2.78368e-07	0	LDHA
1.92911e-11	-0.733896	0.986	0.979	3.5297e-07	0	DPP4
2.03746e-11	-0.859549	0.973	1	3.72795e-07	0	TOB1
2.05428e-11	0.85317	0.716	0.064	3.75872e-07	0	HSPA6
2.06039e-11	-0.55459	0.622	0.979	3.76989e-07	0	HLA-DRB1
2.87584e-11	-0.715468	0.986	0.979	5.26192e-07	0	IGFBP7
3.50716e-11	-0.751471	1	1	6.41704e-07	0	B4GALT1
3.90087e-11	-0.643724	0.757	1	7.13742e-07	0	ISCA1
4.17066e-11	-0.54609	0.811	0.979	7.63105e-07	0	CADM1
4.19724e-11	-0.660941	1	1	7.67969e-07	0	PPIB
4.95044e-11	-1.24509	0.135	0.702	9.05782e-07	0	RNU2-2P
5.10968e-11	-0.567877	0.986	0.979	9.34918e-07	0	MICOS10
5.39102e-11	-0.560904	0.986	1	9.86394e-07	0	ERO1A
5.78625e-11	-0.588238	0.203	0.787	1.05871e-06	0	GSTA1
6.32718e-11	-0.624497	0.986	0.979	1.15768e-06	0	ITM2B
7.57023e-11	-0.87718	0.635	0.957	1.38512e-06	0	MUC1
9.01452e-11	-0.548243	0.986	0.979	1.64939e-06	0	ATP5PD
9.46594e-11	-0.624622	0.919	0.979	1.73198e-06	0	HSPB11
9.50452e-11	-0.523462	0.986	1	1.73904e-06	0	SEM1
9.98138e-11	-0.54473	0.527	0.979	1.82629e-06	0	HOOK1
1.01976e-10	0.887153	1	1	1.86585e-06	0	SOD2
1.05624e-10	-0.507148	0.986	1	1.9326e-06	0	COX5B
1.17113e-10	-0.961521	0.338	0.83	2.14282e-06	0	AL353751.1
1.39075e-10	-0.709046	0.824	0.957	2.54466e-06	0	SLC39A11
1.39781e-10	-0.516355	0.986	1	2.55757e-06	0	RPL37
1.42141e-10	-0.783184	0.959	0.979	2.60075e-06	0	IDI1
1.55197e-10	-0.556781	1	1	2.83963e-06	0	EIF1
1.85568e-10	-0.590879	0.203	0.745	3.39533e-06	0	LEMD1
1.90904e-10	-0.840147	0.932	1	3.49297e-06	0	LIMA1
1.93884e-10	-0.555815	0.419	0.915	3.54749e-06	0	UGT2B7
1.97058e-10	0.696853	0.959	0.617	3.60558e-06	0	CAPG
2.15781e-10	-0.517894	0.986	0.979	3.94814e-06	0	MXRA7
2.19496e-10	-0.544431	0.959	1	4.01612e-06	0	PJA2
2.5093e-10	-0.638521	0.811	0.979	4.59126e-06	0	HMGCS1
2.60513e-10	1.13571	0.986	0.915	4.7666e-06	0	MT-ND3
2.63769e-10	-1.02072	0.757	0.957	4.82618e-06	0	IL18
3.2586e-10	-0.594903	0.959	0.979	5.96226e-06	0	NDUFB7
3.31712e-10	-0.50553	1	0.979	6.06934e-06	0	GOLIM4
3.43256e-10	0.992097	1	1	6.28055e-06	0	SAT1
3.67431e-10	-0.538799	0.973	0.979	6.72289e-06	0	NDUFA2
3.73832e-10	-0.530121	0.986	0.979	6.84001e-06	0	RBX1
4.0709e-10	1.10143	1	0.957	7.44852e-06	0	MT-ND4L
5.81202e-10	-0.52273	0.986	0.979	1.06343e-05	0	UQCRQ
7.38377e-10	-0.613683	0.824	0.979	1.35101e-05	0	HIGD2A
7.73693e-10	-0.520108	0.986	1	1.41563e-05	0	SEC11A
7.73693e-10	-0.61477	1	0.979	1.41563e-05	0	NDUFA12
9.14597e-10	0.738604	1	0.979	1.67344e-05	0	S100A16
1.41725e-09	-0.605402	0.797	0.979	2.59315e-05	0	LIPA
1.45575e-09	-0.637921	1	1	2.66358e-05	0	ENO1
1.555e-09	-0.50583	1	1	2.84518e-05	0	KDELR2
1.60707e-09	0.647158	1	0.979	2.94046e-05	0	RHOC
1.68842e-09	0.685362	0.757	0.213	3.0893e-05	0	C5orf46
1.71636e-09	0.959204	1	0.979	3.14042e-05	0	HSP90AA1
1.84794e-09	-1.07299	0.581	0.915	3.38117e-05	0	AC105277.1
1.93921e-09	-0.639435	0.649	0.979	3.54818e-05	0	TM4SF18
1.93979e-09	0.896754	0.581	0.043	3.54924e-05	0	CSF2
2.0511e-09	-0.581341	0.932	0.979	3.75289e-05	0	TM2D1
2.214e-09	0.608521	0.986	0.83	4.05095e-05	0	ADAMTS1
2.23059e-09	-0.866043	1	1	4.0813e-05	0	MALAT1
2.33739e-09	-0.554606	0.932	0.979	4.27671e-05	0	TTC3
2.55249e-09	-0.536752	0.811	1	4.67029e-05	0	DEPP1
2.8163e-09	-0.553841	0.743	0.915	5.15298e-05	0	RNPC3
3.18882e-09	0.689952	1	0.957	5.83459e-05	0	PSME2
3.53862e-09	-0.664677	0.824	0.936	6.47462e-05	0	SMIM7
3.59994e-09	-2.47747	0.189	0.66	6.5868e-05	0	RNU2-59P
3.83489e-09	-0.500989	0.581	0.957	7.01671e-05	0	NREP
3.93048e-09	-0.625814	0.959	0.979	7.19159e-05	0	TSPAN3
4.22731e-09	-0.682524	0.622	0.894	7.73471e-05	0	SLC16A4
4.26076e-09	0.793997	1	0.936	7.79592e-05	0	PLAUR
4.26076e-09	0.692171	1	0.936	7.79592e-05	0	PHLDA1
4.31122e-09	-0.608047	0.338	0.851	7.88824e-05	0	LINC02532
5.00191e-09	0.565714	1	0.979	9.152e-05	0	S100A13
5.50452e-09	-0.538477	1	1	0.000100716	0	SAR1A
5.533e-09	-0.58361	0.662	1	0.000101237	0	TFDP2
6.25166e-09	-0.513307	1	0.979	0.000114387	0	LAMTOR5
7.25914e-09	-0.646277	0.77	0.979	0.00013282	0	POLR2H
7.3625e-09	-0.561009	0.757	0.936	0.000134712	0	NPPC
7.37967e-09	-0.742727	0.716	0.979	0.000135026	0	DERA
8.0539e-09	1.35248	0.514	0	0.000147362	0	JCHAIN
9.3956e-09	1.12825	0.986	0.872	0.000171911	0	PANTR1
9.72646e-09	0.643763	1	0.979	0.000177965	0	EIF6
1.04112e-08	0.984196	0.973	0.745	0.000190495	0	SERPINA1
1.08531e-08	-0.720769	0.986	0.979	0.000198579	0	ANXA4
1.13619e-08	-0.686445	0.932	1	0.000207888	0	COA3
1.22908e-08	0.661154	0.986	0.936	0.000224885	0	CCT4
1.23679e-08	0.560185	0.946	0.532	0.000226295	0	SERPINE1
1.2886e-08	-0.606283	1	0.979	0.000235776	0	BIRC3
1.30874e-08	-0.674083	0.986	0.979	0.00023946	0	APLP2
1.36862e-08	0.584353	0.946	0.681	0.000250417	0	PSMC4
1.40355e-08	-0.558669	0.797	0.936	0.000256807	0	AL590133.2
1.45883e-08	0.995766	1	0.936	0.000266923	0	CD44
1.55212e-08	-0.563191	0.959	1	0.000283992	0	TMEM54
2.31654e-08	1.10268	1	1	0.000423858	0	MT-RNR2
2.75347e-08	-0.641054	0.581	0.894	0.000503802	0	MCCC1
2.98365e-08	0.55865	0.959	0.723	0.000545918	0	AUP1
3.23829e-08	0.551301	1	0.957	0.00059251	0	SNRPB2
3.41943e-08	0.642498	0.986	0.638	0.000625653	0	INHBA
3.44063e-08	-0.566934	1	0.979	0.000629532	0	ATP5PF
3.44063e-08	-0.583964	1	1	0.000629532	0	KRT19
3.72343e-08	-0.537191	0.878	0.957	0.000681276	0	SLC37A3
3.73428e-08	1.18555	0.973	0.83	0.000683262	0	CACYBP
3.87517e-08	-0.742864	0.919	1	0.000709039	0	TECR
4.16875e-08	-0.516994	0.838	0.979	0.000762755	0	DLG1
4.24832e-08	0.628331	1	0.936	0.000777315	0	KLF10
4.28873e-08	0.681623	0.973	0.66	0.000784708	0	ID2
4.71734e-08	-0.519316	0.959	0.979	0.000863132	0	MPC2
4.79103e-08	-0.610594	0.986	1	0.000876614	0	UGDH
4.79103e-08	-0.637507	1	1	0.000876614	0	PGK1
5.01074e-08	-0.596544	0.986	0.979	0.000916815	0	DYNLT1
5.24075e-08	0.974779	1	1	0.0009589	0	FTH1
5.38395e-08	-0.798537	0.919	0.979	0.000985101	0	PMP22
5.48681e-08	-1.02677	0.095	0.511	0.00100392	0	FXYD2
5.56302e-08	-0.526171	1	0.979	0.00101787	0	PLOD2
5.90324e-08	0.941362	1	0.936	0.00108012	0	MT-ND6
6.15036e-08	-0.602642	0.838	0.979	0.00112533	0	CD58
6.59447e-08	1.06361	0.689	0.17	0.00120659	0	CCL20
6.84934e-08	-0.775334	0.662	0.915	0.00125322	0	INSIG2
7.12428e-08	1.74771	0.486	0.021	0.00130353	0	IGKV3-15
7.17208e-08	-0.640116	0.027	0.404	0.00131228	0	LINC01781
7.22276e-08	-0.567762	0.905	0.957	0.00132155	0	MBD4
8.12802e-08	-0.579321	0.892	0.979	0.00148718	0	WASHC3
9.75308e-08	-0.531801	1	0.979	0.00178452	0	DYNLT3
1.19644e-07	0.516288	1	0.979	0.00218912	0	CDCP1
1.32441e-07	0.561679	0.986	0.979	0.00242327	0	LSP1P4
1.36336e-07	-0.715451	0.986	0.979	0.00249455	0	IGFBP3
1.64344e-07	0.612671	1	0.894	0.003007	0	PSMD8
1.7623e-07	1.11827	0.946	0.809	0.00322447	0	ZFAND2A
1.7623e-07	0.713342	0.973	0.766	0.00322447	0	SNHG15
1.77419e-07	0.627544	0.959	0.574	0.00324624	0	MT1X
1.82963e-07	0.91399	0.5	0.043	0.00334767	0	SERPINB4
1.84542e-07	-0.861499	1	0.979	0.00337657	0	VMP1
1.95429e-07	0.957568	1	1	0.00357576	0	CXCL8
2.15508e-07	-0.549006	0.324	0.872	0.00394314	0	PIR
2.20521e-07	-0.551976	0.878	0.979	0.00403487	0	TMEM243
2.27399e-07	-0.559948	0.77	0.936	0.00416073	0	MTCP1
2.28652e-07	-0.602655	0.986	0.979	0.00418364	0	ERGIC3
2.44143e-07	-0.535967	0.892	0.979	0.00446709	0	PIP4K2A
2.53163e-07	0.528098	0.959	0.745	0.00463213	0	DPH3
2.94665e-07	-0.528331	0.932	0.979	0.00539149	0	ARFGAP3
3.25741e-07	-0.53022	0.986	1	0.00596008	0	LAMB1
3.74752e-07	0.546941	1	0.936	0.00685683	0	ODC1
3.85458e-07	-0.518136	1	0.979	0.00705272	0	MIF
3.95386e-07	-0.651748	0.919	0.979	0.00723438	0	TMBIM4
5.23468e-07	-0.500193	1	1	0.0095779	0	RPL3
5.45612e-07	0.560968	0.986	0.979	0.00998307	0	NIFK
5.51862e-07	-0.629294	0.905	1	0.0100974	0	CA2
5.54859e-07	0.69081	0.946	0.766	0.0101523	0	SELENOT
6.47669e-07	0.810557	0.649	0.149	0.0118504	0	IGHG1
6.70762e-07	-0.51584	1	0.979	0.0122729	0	TMEM230
7.47243e-07	-0.572012	0.946	0.957	0.0136723	0	MRPL27
7.48338e-07	0.921901	1	0.957	0.0136923	0	HSPH1
7.90349e-07	-0.69074	1	1	0.014461	0	UACA
8.5109e-07	-0.55316	0.797	0.957	0.0155724	0	UQCRC2
8.5605e-07	0.547234	0.973	0.702	0.0156631	0	AC245595.1
9.50376e-07	-0.552067	0.622	0.851	0.017389	0	AAMDC
9.87821e-07	0.6968	0.5	0.085	0.0180742	0	MMP3
1.00901e-06	0.556119	1	0.979	0.0184618	0	RSL1D1
1.06407e-06	-0.64282	0.946	0.979	0.0194694	0	UBE2B
1.12372e-06	0.545406	1	0.936	0.0205607	0	CHMP2A
1.14688e-06	0.698255	0.932	0.638	0.0209844	0	HIST1H2BK
1.19349e-06	0.745622	0.932	0.702	0.0218372	0	TNFAIP6
1.22932e-06	0.526589	0.892	0.574	0.022493	0	THUMPD3
1.31079e-06	2.52586	0.662	0.234	0.0239836	0	IGKC
1.32016e-06	-0.552876	1	0.979	0.024155	0	CA12
1.35593e-06	0.513219	1	0.979	0.0248094	0	SF3B6
1.58669e-06	0.5173	0.946	0.596	0.0290317	0	STOML2
1.60982e-06	0.696999	0.797	0.426	0.0294548	0	VEPH1
1.67755e-06	-0.524131	1	1	0.030694	0	DUSP10
1.75315e-06	-0.672801	0.878	0.957	0.0320773	0	AP1M2
1.8647e-06	0.852998	1	0.979	0.0341184	0	UBB
1.91453e-06	-0.86712	1	0.979	0.0350302	0	C3
2.21224e-06	0.929985	0.986	0.979	0.0404773	0	TCP1
2.2415e-06	0.527556	1	0.979	0.0410127	0	DNTTIP2
2.36157e-06	0.593424	1	0.936	0.0432097	0	KARS
5.71616e-20	1.73338	1	0.986	1.04589e-15	1	NME7
8.68713e-20	1.63157	0.894	0.095	1.58948e-15	1	DEFB1
2.99879e-19	-2.34976	0.979	1	5.48688e-15	1	MT2A
3.93824e-19	2.08434	0.957	0.203	7.2058e-15	1	TCN1
3.27625e-18	1.85179	0.979	0.554	5.99456e-14	1	CLU
3.55477e-18	-1.40621	0.255	0.959	6.50417e-14	1	MT1L
9.01568e-18	1.02397	1	1	1.6496e-13	1	HLA-B
1.08699e-17	0.998846	0.915	0.203	1.98886e-13	1	GSTA2
1.67113e-17	1.34027	0.957	0.392	3.05767e-13	1	AC005726.4
5.87311e-17	1.0235	0.957	0.419	1.0746e-12	1	CRYM
1.31617e-16	1.02907	1	1	2.40819e-12	1	NDUFA5
3.80768e-16	1.39514	1	0.959	6.96691e-12	1	CD74
4.07751e-16	1.25269	0.979	0.811	7.46062e-12	1	ALDH1A1
4.15727e-16	0.747029	0.979	0.973	7.60655e-12	1	CTSD
4.55161e-16	1.4037	0.979	0.743	8.32807e-12	1	HMGN3
5.29555e-16	0.825592	0.979	0.554	9.68926e-12	1	ST3GAL5
5.43046e-16	0.94205	0.979	0.459	9.93612e-12	1	MPZL2
9.0876e-16	0.572205	0.979	0.784	1.66276e-11	1	DPYSL3
1.00736e-15	-1.60005	0.851	0.986	1.84316e-11	1	CXCL1
1.15418e-15	0.711271	0.979	0.459	2.11181e-11	1	SULF2
2.25527e-15	0.789037	1	1	4.12646e-11	1	NDUFB2
2.44504e-15	1.23808	0.979	0.703	4.47369e-11	1	PDK4
2.91418e-15	0.748021	0.979	1	5.33208e-11	1	NDUFS5
3.10621e-15	0.769737	0.979	0.986	5.68344e-11	1	ABLIM1
3.44244e-15	1.22391	1	0.919	6.29862e-11	1	TSC22D1
4.27245e-15	1.02942	1	0.986	7.81731e-11	1	BHLHE41
5.39128e-15	0.742447	0.979	0.986	9.86442e-11	1	JUND
6.54342e-15	0.890747	0.979	0.878	1.19725e-10	1	SPOCK1
6.65652e-15	1.07134	0.979	0.986	1.21794e-10	1	HEXB
9.51136e-15	1.29615	1	1	1.74029e-10	1	NNMT
1.45502e-14	0.517094	0.872	0.257	2.66225e-10	1	PRUNE2
1.50477e-14	0.774107	1	1	2.75327e-10	1	AC006064.4
1.57572e-14	0.934908	0.979	0.838	2.8831e-10	1	AC005921.2
1.85158e-14	1.21909	1	1	3.38784e-10	1	SPP1
1.8884e-14	1.02594	0.979	0.959	3.45521e-10	1	BNIP3
1.96998e-14	0.836673	0.979	0.986	3.60447e-10	1	TGFA
2.08446e-14	1.10932	1	0.905	3.81394e-10	1	SYTL2
2.0954e-14	0.88881	1	0.959	3.83395e-10	1	ATP5IF1
2.09624e-14	0.820315	0.979	1	3.8355e-10	1	COX7C
2.27674e-14	0.887494	1	1	4.16576e-10	1	PDZK1IP1
3.17776e-14	0.73311	0.979	0.878	5.81435e-10	1	PPM1H
3.81396e-14	-0.760959	0.085	0.838	6.97841e-10	1	SFTA1P
4.58045e-14	0.650838	0.872	0.257	8.38085e-10	1	HPD
5.83715e-14	0.502074	1	0.959	1.06802e-09	1	ANKRD40
5.86561e-14	0.653979	0.936	0.351	1.07323e-09	1	USH1C
6.58283e-14	1.11509	0.979	0.946	1.20446e-09	1	CDA
6.86842e-14	0.627323	1	1	1.25672e-09	1	S100A10
1.1146e-13	0.657018	1	0.973	2.03938e-09	1	CYP51A1
1.5904e-13	1.22298	1	0.73	2.90996e-09	1	HGD
1.59862e-13	0.865438	1	1	2.92499e-09	1	VDAC1
1.70983e-13	1.33254	1	0.797	3.12848e-09	1	WSB1
1.99949e-13	0.816005	0.957	0.892	3.65847e-09	1	OPN3
2.12426e-13	1.04522	0.957	0.527	3.88676e-09	1	CD24P4
2.6332e-13	0.72699	0.957	0.432	4.81796e-09	1	CCDC198
2.73368e-13	0.616315	0.979	0.986	5.00182e-09	1	COX7B
3.00242e-13	0.606162	0.979	0.919	5.49353e-09	1	RASGRP1
3.20166e-13	0.970897	0.979	0.986	5.85808e-09	1	TNFSF10
3.59984e-13	0.569747	0.894	0.257	6.58663e-09	1	AKR1C3
3.97254e-13	0.851479	1	0.946	7.26855e-09	1	RNF19A
4.13545e-13	0.816886	1	1	7.56663e-09	1	NAP1L1
4.13545e-13	0.648834	1	0.986	7.56663e-09	1	CAMK2N1
4.836e-13	0.681098	0.979	0.973	8.84843e-09	1	NDRG1
5.25629e-13	-0.796307	0.809	0.986	9.61743e-09	1	MT1E
6.35899e-13	0.81499	1	1	1.1635e-08	1	GAPDH
6.35899e-13	0.533881	0.979	1	1.1635e-08	1	LIMCH1
7.39298e-13	0.808639	0.957	0.419	1.35269e-08	1	SSBP2
9.00938e-13	0.729651	1	0.73	1.64845e-08	1	RNF130
9.19515e-13	0.959238	0.979	0.986	1.68244e-08	1	ISG20
9.47095e-13	0.80793	0.979	0.689	1.7329e-08	1	CPM
1.27464e-12	0.602002	0.979	0.797	2.33221e-08	1	PROS1
1.32653e-12	0.797516	0.979	1	2.42715e-08	1	P4HA1
1.32653e-12	-0.81746	0.979	1	2.42715e-08	1	GSTO1
1.36322e-12	0.952447	0.979	0.5	2.49428e-08	1	ALDOC
1.43244e-12	0.795284	1	1	2.62094e-08	1	ATP5F1C
1.60704e-12	0.948131	1	0.986	2.94041e-08	1	PON2
1.73546e-12	-1.58734	0.574	1	3.17536e-08	1	IL6
1.80247e-12	0.808776	1	0.986	3.29798e-08	1	SLC41A2
1.94552e-12	-1.59174	1	1	3.55972e-08	1	MT-ND4
2.58789e-12	0.801407	0.979	0.986	4.73507e-08	1	P4HB
3.70689e-12	0.732357	1	0.986	6.7825e-08	1	NDUFC1
4.15007e-12	0.531996	1	1	7.59338e-08	1	UQCR10
5.19739e-12	-0.626492	0.957	1	9.50966e-08	1	TMA7
5.19781e-12	0.611664	0.979	1	9.51044e-08	1	HINT1
6.22274e-12	0.862761	1	0.892	1.13857e-07	1	RF00100
6.26557e-12	0.652514	0.979	1	1.14641e-07	1	DBI
6.53738e-12	0.525181	0.979	0.878	1.19614e-07	1	MALL
7.04299e-12	1.06774	0.979	0.878	1.28866e-07	1	TMCC1
7.88032e-12	0.741659	0.936	0.581	1.44186e-07	1	RETREG1
1.19766e-11	0.650261	0.957	0.5	2.19136e-07	1	2019-03-03
1.28126e-11	0.629506	0.979	0.905	2.34432e-07	1	FAM162A
1.47726e-11	-0.779088	0.553	0.932	2.70294e-07	1	IFITM2
1.52138e-11	0.885569	1	1	2.78368e-07	1	LDHA
1.92911e-11	0.733896	0.979	0.986	3.5297e-07	1	DPP4
2.03746e-11	0.859549	1	0.973	3.72795e-07	1	TOB1
2.05428e-11	-0.85317	0.064	0.716	3.75872e-07	1	HSPA6
2.06039e-11	0.55459	0.979	0.622	3.76989e-07	1	HLA-DRB1
2.87584e-11	0.715468	0.979	0.986	5.26192e-07	1	IGFBP7
3.50716e-11	0.751471	1	1	6.41704e-07	1	B4GALT1
3.90087e-11	0.643724	1	0.757	7.13742e-07	1	ISCA1
4.17066e-11	0.54609	0.979	0.811	7.63105e-07	1	CADM1
4.19724e-11	0.660941	1	1	7.67969e-07	1	PPIB
4.95044e-11	1.24509	0.702	0.135	9.05782e-07	1	RNU2-2P
5.10968e-11	0.567877	0.979	0.986	9.34918e-07	1	MICOS10
5.39102e-11	0.560904	1	0.986	9.86394e-07	1	ERO1A
5.78625e-11	0.588238	0.787	0.203	1.05871e-06	1	GSTA1
6.32718e-11	0.624497	0.979	0.986	1.15768e-06	1	ITM2B
7.57023e-11	0.87718	0.957	0.635	1.38512e-06	1	MUC1
9.01452e-11	0.548243	0.979	0.986	1.64939e-06	1	ATP5PD
9.46594e-11	0.624622	0.979	0.919	1.73198e-06	1	HSPB11
9.50452e-11	0.523462	1	0.986	1.73904e-06	1	SEM1
9.98138e-11	0.54473	0.979	0.527	1.82629e-06	1	HOOK1
1.01976e-10	-0.887153	1	1	1.86585e-06	1	SOD2
1.05624e-10	0.507148	1	0.986	1.9326e-06	1	COX5B
1.17113e-10	0.961521	0.83	0.338	2.14282e-06	1	AL353751.1
1.39075e-10	0.709046	0.957	0.824	2.54466e-06	1	SLC39A11
1.39781e-10	0.516355	1	0.986	2.55757e-06	1	RPL37
1.42141e-10	0.783184	0.979	0.959	2.60075e-06	1	IDI1
1.55197e-10	0.556781	1	1	2.83963e-06	1	EIF1
1.85568e-10	0.590879	0.745	0.203	3.39533e-06	1	LEMD1
1.90904e-10	0.840147	1	0.932	3.49297e-06	1	LIMA1
1.93884e-10	0.555815	0.915	0.419	3.54749e-06	1	UGT2B7
1.97058e-10	-0.696853	0.617	0.959	3.60558e-06	1	CAPG
2.15781e-10	0.517894	0.979	0.986	3.94814e-06	1	MXRA7
2.19496e-10	0.544431	1	0.959	4.01612e-06	1	PJA2
2.5093e-10	0.638521	0.979	0.811	4.59126e-06	1	HMGCS1
2.60513e-10	-1.13571	0.915	0.986	4.7666e-06	1	MT-ND3
2.63769e-10	1.02072	0.957	0.757	4.82618e-06	1	IL18
3.2586e-10	0.594903	0.979	0.959	5.96226e-06	1	NDUFB7
3.31712e-10	0.50553	0.979	1	6.06934e-06	1	GOLIM4
3.43256e-10	-0.992097	1	1	6.28055e-06	1	SAT1
3.67431e-10	0.538799	0.979	0.973	6.72289e-06	1	NDUFA2
3.73832e-10	0.530121	0.979	0.986	6.84001e-06	1	RBX1
4.0709e-10	-1.10143	0.957	1	7.44852e-06	1	MT-ND4L
5.81202e-10	0.52273	0.979	0.986	1.06343e-05	1	UQCRQ
7.38377e-10	0.613683	0.979	0.824	1.35101e-05	1	HIGD2A
7.73693e-10	0.61477	0.979	1	1.41563e-05	1	NDUFA12
7.73693e-10	0.520108	1	0.986	1.41563e-05	1	SEC11A
9.14597e-10	-0.738604	0.979	1	1.67344e-05	1	S100A16
1.41725e-09	0.605402	0.979	0.797	2.59315e-05	1	LIPA
1.45575e-09	0.637921	1	1	2.66358e-05	1	ENO1
1.555e-09	0.50583	1	1	2.84518e-05	1	KDELR2
1.60707e-09	-0.647158	0.979	1	2.94046e-05	1	RHOC
1.68842e-09	-0.685362	0.213	0.757	3.0893e-05	1	C5orf46
1.71636e-09	-0.959204	0.979	1	3.14042e-05	1	HSP90AA1
1.84794e-09	1.07299	0.915	0.581	3.38117e-05	1	AC105277.1
1.93921e-09	0.639435	0.979	0.649	3.54818e-05	1	TM4SF18
1.93979e-09	-0.896754	0.043	0.581	3.54924e-05	1	CSF2
2.0511e-09	0.581341	0.979	0.932	3.75289e-05	1	TM2D1
2.214e-09	-0.608521	0.83	0.986	4.05095e-05	1	ADAMTS1
2.23059e-09	0.866043	1	1	4.0813e-05	1	MALAT1
2.33739e-09	0.554606	0.979	0.932	4.27671e-05	1	TTC3
2.55249e-09	0.536752	1	0.811	4.67029e-05	1	DEPP1
2.8163e-09	0.553841	0.915	0.743	5.15298e-05	1	RNPC3
3.18882e-09	-0.689952	0.957	1	5.83459e-05	1	PSME2
3.53862e-09	0.664677	0.936	0.824	6.47462e-05	1	SMIM7
3.59994e-09	2.47747	0.66	0.189	6.5868e-05	1	RNU2-59P
3.83489e-09	0.500989	0.957	0.581	7.01671e-05	1	NREP
3.93048e-09	0.625814	0.979	0.959	7.19159e-05	1	TSPAN3
4.22731e-09	0.682524	0.894	0.622	7.73471e-05	1	SLC16A4
4.26076e-09	-0.692171	0.936	1	7.79592e-05	1	PHLDA1
4.26076e-09	-0.793997	0.936	1	7.79592e-05	1	PLAUR
4.31122e-09	0.608047	0.851	0.338	7.88824e-05	1	LINC02532
5.00191e-09	-0.565714	0.979	1	9.152e-05	1	S100A13
5.50452e-09	0.538477	1	1	0.000100716	1	SAR1A
5.533e-09	0.58361	1	0.662	0.000101237	1	TFDP2
6.25166e-09	0.513307	0.979	1	0.000114387	1	LAMTOR5
7.25914e-09	0.646277	0.979	0.77	0.00013282	1	POLR2H
7.3625e-09	0.561009	0.936	0.757	0.000134712	1	NPPC
7.37967e-09	0.742727	0.979	0.716	0.000135026	1	DERA
8.0539e-09	-1.35248	0	0.514	0.000147362	1	JCHAIN
9.3956e-09	-1.12825	0.872	0.986	0.000171911	1	PANTR1
9.72646e-09	-0.643763	0.979	1	0.000177965	1	EIF6
1.04112e-08	-0.984196	0.745	0.973	0.000190495	1	SERPINA1
1.08531e-08	0.720769	0.979	0.986	0.000198579	1	ANXA4
1.13619e-08	0.686445	1	0.932	0.000207888	1	COA3
1.22908e-08	-0.661154	0.936	0.986	0.000224885	1	CCT4
1.23679e-08	-0.560185	0.532	0.946	0.000226295	1	SERPINE1
1.2886e-08	0.606283	0.979	1	0.000235776	1	BIRC3
1.30874e-08	0.674083	0.979	0.986	0.00023946	1	APLP2
1.36862e-08	-0.584353	0.681	0.946	0.000250417	1	PSMC4
1.40355e-08	0.558669	0.936	0.797	0.000256807	1	AL590133.2
1.45883e-08	-0.995766	0.936	1	0.000266923	1	CD44
1.55212e-08	0.563191	1	0.959	0.000283992	1	TMEM54
2.31654e-08	-1.10268	1	1	0.000423858	1	MT-RNR2
2.75347e-08	0.641054	0.894	0.581	0.000503802	1	MCCC1
2.98365e-08	-0.55865	0.723	0.959	0.000545918	1	AUP1
3.23829e-08	-0.551301	0.957	1	0.00059251	1	SNRPB2
3.41943e-08	-0.642498	0.638	0.986	0.000625653	1	INHBA
3.44063e-08	0.583964	1	1	0.000629532	1	KRT19
3.44063e-08	0.566934	0.979	1	0.000629532	1	ATP5PF
3.72343e-08	0.537191	0.957	0.878	0.000681276	1	SLC37A3
3.73428e-08	-1.18555	0.83	0.973	0.000683262	1	CACYBP
3.87517e-08	0.742864	1	0.919	0.000709039	1	TECR
4.16875e-08	0.516994	0.979	0.838	0.000762755	1	DLG1
4.24832e-08	-0.628331	0.936	1	0.000777315	1	KLF10
4.28873e-08	-0.681623	0.66	0.973	0.000784708	1	ID2
4.71734e-08	0.519316	0.979	0.959	0.000863132	1	MPC2
4.79103e-08	0.637507	1	1	0.000876614	1	PGK1
4.79103e-08	0.610594	1	0.986	0.000876614	1	UGDH
5.01074e-08	0.596544	0.979	0.986	0.000916815	1	DYNLT1
5.24075e-08	-0.974779	1	1	0.0009589	1	FTH1
5.38395e-08	0.798537	0.979	0.919	0.000985101	1	PMP22
5.48681e-08	1.02677	0.511	0.095	0.00100392	1	FXYD2
5.56302e-08	0.526171	0.979	1	0.00101787	1	PLOD2
5.90324e-08	-0.941362	0.936	1	0.00108012	1	MT-ND6
6.15036e-08	0.602642	0.979	0.838	0.00112533	1	CD58
6.59447e-08	-1.06361	0.17	0.689	0.00120659	1	CCL20
6.84934e-08	0.775334	0.915	0.662	0.00125322	1	INSIG2
7.12428e-08	-1.74771	0.021	0.486	0.00130353	1	IGKV3-15
7.17208e-08	0.640116	0.404	0.027	0.00131228	1	LINC01781
7.22276e-08	0.567762	0.957	0.905	0.00132155	1	MBD4
8.12802e-08	0.579321	0.979	0.892	0.00148718	1	WASHC3
9.75308e-08	0.531801	0.979	1	0.00178452	1	DYNLT3
1.19644e-07	-0.516288	0.979	1	0.00218912	1	CDCP1
1.32441e-07	-0.561679	0.979	0.986	0.00242327	1	LSP1P4
1.36336e-07	0.715451	0.979	0.986	0.00249455	1	IGFBP3
1.64344e-07	-0.612671	0.894	1	0.003007	1	PSMD8
1.7623e-07	-0.713342	0.766	0.973	0.00322447	1	SNHG15
1.7623e-07	-1.11827	0.809	0.946	0.00322447	1	ZFAND2A
1.77419e-07	-0.627544	0.574	0.959	0.00324624	1	MT1X
1.82963e-07	-0.91399	0.043	0.5	0.00334767	1	SERPINB4
1.84542e-07	0.861499	0.979	1	0.00337657	1	VMP1
1.95429e-07	-0.957568	1	1	0.00357576	1	CXCL8
2.15508e-07	0.549006	0.872	0.324	0.00394314	1	PIR
2.20521e-07	0.551976	0.979	0.878	0.00403487	1	TMEM243
2.27399e-07	0.559948	0.936	0.77	0.00416073	1	MTCP1
2.28652e-07	0.602655	0.979	0.986	0.00418364	1	ERGIC3
2.44143e-07	0.535967	0.979	0.892	0.00446709	1	PIP4K2A
2.53163e-07	-0.528098	0.745	0.959	0.00463213	1	DPH3
2.94665e-07	0.528331	0.979	0.932	0.00539149	1	ARFGAP3
3.25741e-07	0.53022	1	0.986	0.00596008	1	LAMB1
3.74752e-07	-0.546941	0.936	1	0.00685683	1	ODC1
3.85458e-07	0.518136	0.979	1	0.00705272	1	MIF
3.95386e-07	0.651748	0.979	0.919	0.00723438	1	TMBIM4
5.23468e-07	0.500193	1	1	0.0095779	1	RPL3
5.45612e-07	-0.560968	0.979	0.986	0.00998307	1	NIFK
5.51862e-07	0.629294	1	0.905	0.0100974	1	CA2
5.54859e-07	-0.69081	0.766	0.946	0.0101523	1	SELENOT
6.47669e-07	-0.810557	0.149	0.649	0.0118504	1	IGHG1
6.70762e-07	0.51584	0.979	1	0.0122729	1	TMEM230
7.47243e-07	0.572012	0.957	0.946	0.0136723	1	MRPL27
7.48338e-07	-0.921901	0.957	1	0.0136923	1	HSPH1
7.90349e-07	0.69074	1	1	0.014461	1	UACA
8.5109e-07	0.55316	0.957	0.797	0.0155724	1	UQCRC2
8.5605e-07	-0.547234	0.702	0.973	0.0156631	1	AC245595.1
9.50376e-07	0.552067	0.851	0.622	0.017389	1	AAMDC
9.87821e-07	-0.6968	0.085	0.5	0.0180742	1	MMP3
1.00901e-06	-0.556119	0.979	1	0.0184618	1	RSL1D1
1.06407e-06	0.64282	0.979	0.946	0.0194694	1	UBE2B
1.12372e-06	-0.545406	0.936	1	0.0205607	1	CHMP2A
1.14688e-06	-0.698255	0.638	0.932	0.0209844	1	HIST1H2BK
1.19349e-06	-0.745622	0.702	0.932	0.0218372	1	TNFAIP6
1.22932e-06	-0.526589	0.574	0.892	0.022493	1	THUMPD3
1.31079e-06	-2.52586	0.234	0.662	0.0239836	1	IGKC
1.32016e-06	0.552876	0.979	1	0.024155	1	CA12
1.35593e-06	-0.513219	0.979	1	0.0248094	1	SF3B6
1.58669e-06	-0.5173	0.596	0.946	0.0290317	1	STOML2
1.60982e-06	-0.696999	0.426	0.797	0.0294548	1	VEPH1
1.67755e-06	0.524131	1	1	0.030694	1	DUSP10
1.75315e-06	0.672801	0.957	0.878	0.0320773	1	AP1M2
1.8647e-06	-0.852998	0.979	1	0.0341184	1	UBB
1.91453e-06	0.86712	0.979	1	0.0350302	1	C3
2.21224e-06	-0.929985	0.979	0.986	0.0404773	1	TCP1
2.2415e-06	-0.527556	0.979	1	0.0410127	1	DNTTIP2
2.36157e-06	-0.593424	0.936	1	0.0432097	1	KARS
