# Supplementary material for: Development and validation of a metastasis-associated prognostic signature based on single-cell RNA-seq in clear cell renal cell carcinoma
Source: Aging (Albany NY). 2019 Nov 20;11(22):10183–202. doi: 10.18632/aging.102434 (PMC6914399; doi:10.18632/aging.102434)
Supplement: Supplementary Table 3 [file aging-11-102434-s003..xls]

## Sheet: 07.cellAnn
Supplementary Table 3. Annotation of cell types for the 121 cell samples.
metastaisisPDX_1	Megakaryocytes
metastaisisPDX_2	Megakaryocytes
metastaisisPDX_3	Megakaryocytes
metastaisisPDX_4	Megakaryocytes
metastaisisPDX_5	Megakaryocytes
metastaisisPDX_6	Megakaryocytes
metastaisisPDX_7	Megakaryocytes
metastaisisPDX_8	Megakaryocytes
metastaisisPDX_9	Megakaryocytes
metastaisisPDX_10	Megakaryocytes
metastaisisPDX_11	Megakaryocytes
metastaisisPDX_12	CD14+ Monocytes
metastaisisPDX_13	CD14+ Monocytes
metastaisisPDX_14	FCGR3A+ Monocytes
metastaisisPDX_15	Megakaryocytes
metastaisisPDX_16	FCGR3A+ Monocytes
metastaisisPDX_17	Megakaryocytes
metastaisisPDX_18	FCGR3A+ Monocytes
metastaisisPDX_19	CD14+ Monocytes
metastaisisPDX_20	Megakaryocytes
metastaisisPDX_21	FCGR3A+ Monocytes
metastaisisPDX_22	FCGR3A+ Monocytes
metastaisisPDX_23	FCGR3A+ Monocytes
metastaisisPDX_24	Megakaryocytes
metastaisisPDX_25	FCGR3A+ Monocytes
metastaisisPDX_26	Megakaryocytes
metastaisisPDX_27	Megakaryocytes
metastaisisPDX_28	Megakaryocytes
metastaisisPDX_29	Megakaryocytes
metastaisisPDX_30	FCGR3A+ Monocytes
metastaisisPDX_31	FCGR3A+ Monocytes
metastaisisPDX_32	Megakaryocytes
metastaisisPDX_33	FCGR3A+ Monocytes
metastaisisPDX_34	Megakaryocytes
metastaisisPDX_35	FCGR3A+ Monocytes
metastaisisPDX_36	Megakaryocytes
metastaisisPDX_37	FCGR3A+ Monocytes
primaryPDX_1	Megakaryocytes
primaryPDX_2	Megakaryocytes
primaryPDX_3	Megakaryocytes
primaryPDX_4	Megakaryocytes
primaryPDX_5	Megakaryocytes
primaryPDX_6	Megakaryocytes
primaryPDX_7	Megakaryocytes
primaryPDX_8	Megakaryocytes
primaryPDX_9	Megakaryocytes
primaryPDX_10	Megakaryocytes
primaryPDX_11	Megakaryocytes
primaryPDX_12	Megakaryocytes
primaryPDX_13	Megakaryocytes
primaryPDX_14	Megakaryocytes
primaryPDX_15	Megakaryocytes
primaryPDX_16	Megakaryocytes
primaryPDX_17	Megakaryocytes
primaryPDX_18	Megakaryocytes
primaryPDX_19	Megakaryocytes
primaryPDX_20	Megakaryocytes
primaryPDX_21	Megakaryocytes
primaryPDX_22	Megakaryocytes
primaryPDX_23	Megakaryocytes
primaryPDX_24	Megakaryocytes
primaryPDX_25	Megakaryocytes
primaryPDX_26	Megakaryocytes
primaryPDX_27	Megakaryocytes
primaryPDX_28	Megakaryocytes
primaryPDX_29	Megakaryocytes
primaryPDX_30	Megakaryocytes
primaryPDX_31	Megakaryocytes
primaryPDX_32	Megakaryocytes
primaryPDX_33	Megakaryocytes
primaryPDX_34	Megakaryocytes
primaryPDX_35	Megakaryocytes
primaryPDX_36	Megakaryocytes
primaryPDX_37	Megakaryocytes
primaryPDX_38	Megakaryocytes
primaryPDX_39	Megakaryocytes
primaryPDX_40	Megakaryocytes
primaryPDX_41	Megakaryocytes
primaryPDX_42	Megakaryocytes
primaryPDX_43	Megakaryocytes
primaryPDX_44	Megakaryocytes
primaryPDX_45	Megakaryocytes
primaryPDX_46	Megakaryocytes
primaryPDX_47	Megakaryocytes
primaryPDX_48	Megakaryocytes
patientmRCC_1	Megakaryocytes
patientmRCC_2	Megakaryocytes
patientmRCC_3	FCGR3A+ Monocytes
patientmRCC_4	Megakaryocytes
patientmRCC_5	Megakaryocytes
patientmRCC_6	Megakaryocytes
patientmRCC_7	Megakaryocytes
patientmRCC_8	Megakaryocytes
patientmRCC_9	FCGR3A+ Monocytes
patientmRCC_10	FCGR3A+ Monocytes
patientmRCC_11	FCGR3A+ Monocytes
patientmRCC_12	Megakaryocytes
patientmRCC_13	Megakaryocytes
patientmRCC_14	FCGR3A+ Monocytes
patientmRCC_15	FCGR3A+ Monocytes
patientmRCC_16	Megakaryocytes
patientmRCC_17	Megakaryocytes
patientmRCC_18	Megakaryocytes
patientmRCC_19	Megakaryocytes
patientmRCC_20	Megakaryocytes
patientmRCC_21	FCGR3A+ Monocytes
patientmRCC_22	FCGR3A+ Monocytes
patientmRCC_23	FCGR3A+ Monocytes
patientmRCC_24	FCGR3A+ Monocytes
patientmRCC_25	Megakaryocytes
patientmRCC_26	Megakaryocytes
patientmRCC_27	Megakaryocytes
patientmRCC_28	Megakaryocytes
patientmRCC_29	Megakaryocytes
patientmRCC_30	FCGR3A+ Monocytes
patientmRCC_31	Megakaryocytes
patientmRCC_32	FCGR3A+ Monocytes
patientmRCC_33	FCGR3A+ Monocytes
patientmRCC_34	FCGR3A+ Monocytes
patientmRCC_35	FCGR3A+ Monocytes
patientmRCC_36	Megakaryocytes
