# Supplementary material for: Development and validation of a metastasis-associated prognostic signature based on single-cell RNA-seq in clear cell renal cell carcinoma
Source: Aging (Albany NY). 2019 Nov 20;11(22):10183–202. doi: 10.18632/aging.102434 (PMC6914399; doi:10.18632/aging.102434)
Supplement: Supplementary Table 4 [file aging-11-102434-s001..xls]

## Sheet: risk1
Supplementary Table 4. Calculation of MAGs risk scores for ICGC patients.
id	futime	fustat	riskScore	risk
DO47016	5.4137	0	0.158851	low
DO47028	5.83014	0	0.190544	low
DO47000	5.81096	0	0.25582	low
DO46862	4.48219	0	0.368082	low
DO47222	4.29041	0	0.386202	low
DO46832	0.00547945	0	0.390159	low
DO47231	4.43562	0	0.422107	low
DO47096	5.64384	0	0.422427	low
DO47008	4.48767	0	0.424803	low
DO47213	5.26575	0	0.451322	low
DO47207	4.21096	0	0.459642	low
DO46973	5.91781	0	0.489544	low
DO47048	5.29315	0	0.505381	low
DO46830	5.6	0	0.513792	low
DO47162	4.07945	0	0.542274	low
DO47128	6.20274	0	0.56096	low
DO46856	5.59452	0	0.570275	low
DO47198	4.32877	0	0.57087	low
DO46965	4.54247	0	0.57318	low
DO46847	5.64932	0	0.59411	low
DO47228	2.76712	0	0.631888	low
DO46913	4.89589	0	0.645752	low
DO47004	0.605479	1	0.66599	low
DO47204	4.77534	0	0.673171	low
DO47100	4.86027	0	0.718084	low
DO47183	0.476712	1	0.727048	low
DO47080	5.10685	0	0.730331	low
DO47216	5.27671	0	0.73416	low
DO46945	5.26575	0	0.734768	low
DO47201	4.83836	0	0.764754	low
DO47132	5.87123	0	0.789305	low
DO47044	2.00274	0	0.807979	low
DO46850	0.312329	1	0.809947	low
DO47032	5.15616	0	0.815416	low
DO47195	5.15342	0	0.816921	low
DO47219	4.99178	0	0.818665	low
DO46827	2.14247	1	0.820329	low
DO46859	4.34521	0	0.836307	low
DO46969	4.96712	0	0.871993	low
DO47084	0.20274	1	0.872027	low
DO47156	5.29315	0	0.885632	low
DO46984	5.36164	0	0.897974	low
DO47036	5.36712	0	0.958263	low
DO47040	5.51233	0	0.960483	low
DO46841	3.43562	1	1.00992	low
DO47120	5.47671	0	1.01421	low
DO46834	2.67945	1	1.05488	high
DO47159	3.8411	1	1.05491	high
DO47068	4.61644	1	1.05608	high
DO47177	5.53699	0	1.0851	high
DO46996	5.09589	1	1.09785	high
DO47140	5.30411	0	1.12576	high
DO46925	5.82466	0	1.13266	high
DO46873	4.21644	1	1.15316	high
DO47024	6.22192	1	1.15769	high
DO47210	4.10411	0	1.16043	high
DO47225	4.72055	1	1.16427	high
DO47168	5.42466	1	1.21077	high
DO46905	0.635616	0	1.29325	high
DO47020	5.26849	1	1.36235	high
DO47056	5.76438	0	1.36257	high
DO46980	2.81918	1	1.46944	high
DO46893	0.4	1	1.4883	high
DO47186	1.7863	1	1.49165	high
DO46853	5.7863	0	1.51196	high
DO46941	1.79178	0	1.52238	high
DO46992	5.04658	0	1.52602	high
DO46988	3.09589	1	1.5591	high
DO46917	5.76438	0	1.62242	high
DO47180	0.139726	0	1.62492	high
DO47174	4.13151	1	1.67322	high
DO47012	1.13699	1	1.6814	high
DO47076	5.11233	1	1.71281	high
DO46961	4.99726	0	1.72191	high
DO46877	4.31781	1	1.73449	high
DO46909	2.68767	1	1.8104	high
DO47144	5.7589	0	1.83784	high
DO46838	5.99726	0	1.84794	high
DO47072	2.16164	1	1.86518	high
DO46953	5.07397	1	1.88887	high
DO46865	5.63836	0	1.90751	high
DO46889	2.73151	1	1.94759	high
DO47108	2.81644	1	1.96856	high
DO47171	1.29863	1	2.02668	high
DO46933	3.20548	0	2.03669	high
DO46844	5.74521	0	2.21314	high
DO46957	5.90685	0	2.7807	high
DO47192	3.8137	1	3.41633	high
DO47189	4.06027	1	4.32058	high
DO46949	1.29863	1	4.99618	high
DO46828	1.54521	1	5.79221	high
