# Supplementary material for: Development and validation of a metastasis-associated prognostic signature based on single-cell RNA-seq in clear cell renal cell carcinoma
Source: Aging (Albany NY). 2019 Nov 20;11(22):10183–202. doi: 10.18632/aging.102434 (PMC6914399; doi:10.18632/aging.102434)
Supplement: Supplementary Table 5 [file aging-11-102434-s004..xls]

## Sheet: TMB-RISK
Supplementary Table 5. Integration of tumor progression risk scores with corresponding tumor mutation burden (TMB) in TCGA-KIRC cohort.
id	MAGs-nomogram	risk level	TMB
TCGA-A3-3308	1.60709	high	2.39474
TCGA-A3-3316	1.73022	high	1.21053
TCGA-A3-3319	1.50937	high	2.15789
TCGA-A3-3346	1.96334	high	2.60526
TCGA-A3-3357	1.44747	high	2.84211
TCGA-A3-3363	0.887949	high	1.36842
TCGA-A3-3372	1.6638	high	1.76316
TCGA-A3-3382	0.885878	high	2.97368
TCGA-AK-3453	1.2346	high	0.368421
TCGA-AK-3455	2.66035	high	1.73684
TCGA-B0-4700	5.29674	high	0.394737
TCGA-B0-4827	3.7038	high	2.44737
TCGA-B0-4842	3.68115	high	1.55263
TCGA-B0-5075	3.01921	high	2.73684
TCGA-B0-5077	0.915452	high	1.5
TCGA-B0-5081	4.25161	high	0.684211
TCGA-B0-5084	4.70649	high	1.44737
TCGA-B0-5085	3.90731	high	2
TCGA-B0-5092	3.69108	high	1.42105
TCGA-B0-5094	4.91683	high	2.39474
TCGA-B0-5095	6.90822	high	2.21053
TCGA-B0-5097	1.22319	high	1.68421
TCGA-B0-5098	0.902037	high	21.1579
TCGA-B0-5099	3.91564	high	2.10526
TCGA-B0-5100	4.85895	high	0.973684
TCGA-B0-5107	12.0182	high	1.84211
TCGA-B0-5108	1.32914	high	1.39474
TCGA-B0-5109	8.31497	high	1.39474
TCGA-B0-5113	2.31168	high	1.13158
TCGA-B0-5115	1.91968	high	1.57895
TCGA-B0-5116	1.43485	high	1.84211
TCGA-B0-5400	4.70248	high	0.842105
TCGA-B0-5402	2.5379	high	1.39474
TCGA-B0-5692	1.56188	high	2.21053
TCGA-B0-5694	2.89689	high	1.94737
TCGA-B0-5696	1.86331	high	1.42105
TCGA-B0-5701	2.71815	high	3.05263
TCGA-B0-5709	1.90612	high	2.05263
TCGA-B0-5711	1.14893	high	0.894737
TCGA-B0-5712	2.68768	high	2.97368
TCGA-B0-5713	1.7822	high	2.86842
TCGA-B2-5639	1.85429	high	1.73684
TCGA-B4-5377	2.3902	high	1.44737
TCGA-B4-5832	1.18086	high	1.68421
TCGA-B4-5835	1.08508	high	1.86842
TCGA-B8-4143	5.56194	high	1.89474
TCGA-B8-4151	0.953561	high	1.63158
TCGA-B8-4153	2.68623	high	1.84211
TCGA-B8-4622	2.27579	high	1.68421
TCGA-B8-5158	3.05984	high	1.28947
TCGA-B8-5163	2.66819	high	1.97368
TCGA-B8-5164	1.73654	high	2.28947
TCGA-B8-5550	1.45539	high	3
TCGA-B8-5551	0.984434	high	1.07895
TCGA-B8-A54D	2.83653	high	1.78947
TCGA-B8-A54G	1.21929	high	1.26316
TCGA-B8-A54H	1.27054	high	2.36842
TCGA-B8-A54J	1.14762	high	2.07895
TCGA-BP-4770	18.5469	high	1.55263
TCGA-BP-4960	1.34096	high	1.78947
TCGA-BP-4967	1.84818	high	2.05263
TCGA-BP-4970	1.14843	high	0.789474
TCGA-BP-4971	1.44468	high	1.23684
TCGA-BP-4972	1.03475	high	1.26316
TCGA-BP-4973	1.22203	high	0.842105
TCGA-BP-4974	3.16293	high	0.894737
TCGA-BP-4981	3.81135	high	1.47368
TCGA-BP-4983	2.61825	high	1.71053
TCGA-BP-4985	5.06515	high	2.23684
TCGA-BP-4986	1.34356	high	1.13158
TCGA-BP-4989	1.78563	high	2
TCGA-BP-4992	0.96298	high	1.10526
TCGA-BP-5009	1.18545	high	1.21053
TCGA-BP-5010	3.86858	high	1.97368
TCGA-BP-5169	3.51521	high	1.5
TCGA-BP-5178	4.02488	high	1.78947
TCGA-BP-5183	1.80422	high	1.5
TCGA-BP-5191	1.74498	high	1.65789
TCGA-BP-5196	1.57455	high	1.42105
TCGA-BP-5198	3.74215	high	2.23684
TCGA-BP-5199	1.60209	high	2.34211
TCGA-BP-5200	1.04007	high	1.28947
TCGA-BP-5202	1.81331	high	1.10526
TCGA-CJ-4869	1.22586	high	2.10526
TCGA-CJ-4882	2.83402	high	1.73684
TCGA-CJ-4900	12.4892	high	1.39474
TCGA-CJ-4901	2.83356	high	1.34211
TCGA-CJ-4902	1.85079	high	1.73684
TCGA-CJ-4904	1.9641	high	1.05263
TCGA-CJ-4907	1.16059	high	1.57895
TCGA-CJ-4912	1.351	high	2.44737
TCGA-CJ-4916	2.17852	high	1.36842
TCGA-CJ-4918	5.54197	high	2.13158
TCGA-CJ-5675	1.47552	high	1.78947
TCGA-CJ-5676	2.68324	high	1.73684
TCGA-CJ-5677	9.00407	high	1.92105
TCGA-CJ-5678	3.40652	high	1.5
TCGA-CJ-5679	3.10685	high	2.73684
TCGA-CJ-5680	2.73502	high	1.65789
TCGA-CJ-5681	1.65648	high	0.552632
TCGA-CJ-5682	3.36774	high	2.18421
TCGA-CJ-5684	1.08361	high	1.42105
TCGA-CJ-5689	1.20171	high	2.10526
TCGA-CJ-6027	1.31191	high	2.44737
TCGA-CJ-6028	4.49177	high	1.18421
TCGA-CJ-6032	0.900529	high	1.42105
TCGA-CJ-6033	5.8658	high	2.26316
TCGA-CW-5580	3.12488	high	2.68421
TCGA-CW-5585	0.954495	high	1.52632
TCGA-CW-5587	0.985376	high	1.81579
TCGA-CW-5591	1.24699	high	1.05263
TCGA-CW-6087	19.3639	high	1.39474
TCGA-CW-6090	1.2576	high	3.36842
TCGA-CW-6097	1.34615	high	0.342105
TCGA-CZ-4863	1.02994	high	1.13158
TCGA-CZ-4864	1.61462	high	2.52632
TCGA-CZ-5451	0.944477	high	2.36842
TCGA-CZ-5452	0.913463	high	0.894737
TCGA-CZ-5454	2.09362	high	0.868421
TCGA-CZ-5455	2.89724	high	1.23684
TCGA-CZ-5456	1.15907	high	1.86842
TCGA-CZ-5457	1.53999	high	2.15789
TCGA-CZ-5459	2.00235	high	2.78947
TCGA-CZ-5460	1.52911	high	1.92105
TCGA-CZ-5461	2.24582	high	1.89474
TCGA-CZ-5462	3.3367	high	1.89474
TCGA-CZ-5465	1.78368	high	3.23684
TCGA-CZ-5466	1.02487	high	1.92105
TCGA-CZ-5467	2.66806	high	1.73684
TCGA-CZ-5468	3.83979	high	3.55263
TCGA-CZ-5470	1.29599	high	1.39474
TCGA-CZ-5985	0.913008	high	1.63158
TCGA-CZ-5987	2.00674	high	1.60526
TCGA-DV-A4VX	5.63847	high	2.60526
TCGA-EU-5907	2.12857	high	1.28947
TCGA-G6-A5PC	4.98978	high	1.92105
TCGA-G6-A8L6	3.17507	high	2.02632
TCGA-G6-A8L7	0.942409	high	2.5
TCGA-MM-A564	1.64206	high	3.02632
TCGA-MM-A84U	0.859976	high	2.73684
TCGA-3Z-A93Z	0.560822	low	2.94737
TCGA-6D-AA2E	0.770743	low	0.815789
TCGA-A3-3311	0.536528	low	1.68421
TCGA-A3-3313	0.6929	low	2.78947
TCGA-A3-3317	0.658529	low	2.42105
TCGA-A3-3320	0.220469	low	2.42105
TCGA-A3-3322	0.397533	low	1.55263
TCGA-A3-3323	0.326604	low	1.28947
TCGA-A3-3326	0.195502	low	1.73684
TCGA-A3-3331	0.533991	low	2
TCGA-A3-3358	0.656153	low	1.92105
TCGA-A3-3365	0.304876	low	1.13158
TCGA-A3-3367	0.589845	low	2.05263
TCGA-A3-3370	0.286413	low	1.13158
TCGA-A3-3373	0.366616	low	1.84211
TCGA-A3-3374	0.347822	low	0.447368
TCGA-A3-3376	0.283572	low	1.28947
TCGA-A3-3378	0.737931	low	2
TCGA-A3-3380	0.316026	low	0.947368
TCGA-A3-3383	0.304977	low	1.65789
TCGA-A3-3385	0.304367	low	1.89474
TCGA-A3-3387	0.378927	low	2.07895
TCGA-A3-A6NI	0.450698	low	2.63158
TCGA-A3-A6NJ	0.25892	low	1.42105
TCGA-A3-A6NL	0.305767	low	1.34211
TCGA-A3-A6NN	0.508354	low	2.94737
TCGA-A3-A8CQ	0.396071	low	1.5
TCGA-A3-A8OU	0.383032	low	2.28947
TCGA-A3-A8OV	0.590966	low	4.86842
TCGA-A3-A8OW	0.602029	low	0.552632
TCGA-A3-A8OX	0.606246	low	0.236842
TCGA-AK-3440	0.827416	low	0.605263
TCGA-AK-3447	0.631947	low	0.631579
TCGA-AS-3778	0.12365	low	1.76316
TCGA-B0-4823	0.491737	low	3.23684
TCGA-B0-4945	0.506461	low	1.13158
TCGA-B0-5083	0.610018	low	0.236842
TCGA-B0-5088	0.70983	low	1.57895
TCGA-B0-5102	0.819286	low	1.34211
TCGA-B0-5104	0.811731	low	1.86842
TCGA-B0-5106	0.589454	low	2.52632
TCGA-B0-5110	0.544633	low	1.89474
TCGA-B0-5117	0.267036	low	0.315789
TCGA-B0-5119	0.30627	low	2.63158
TCGA-B0-5120	0.56964	low	1.71053
TCGA-B0-5121	0.460952	low	1.34211
TCGA-B0-5399	0.34753	low	1.13158
TCGA-B0-5690	0.166733	low	1.63158
TCGA-B0-5691	0.421624	low	1.5
TCGA-B0-5693	0.257245	low	1.07895
TCGA-B0-5695	0.37328	low	1.76316
TCGA-B0-5697	0.352427	low	1.63158
TCGA-B0-5698	0.80305	low	2.15789
TCGA-B0-5699	0.289215	low	1.47368
TCGA-B0-5700	0.45282	low	2.13158
TCGA-B0-5702	0.292515	low	1.31579
TCGA-B0-5703	0.674339	low	2.31579
TCGA-B0-5705	0.353679	low	2.39474
TCGA-B0-5706	0.634146	low	1.73684
TCGA-B0-5707	0.457743	low	1.18421
TCGA-B0-5710	0.387427	low	1.15789
TCGA-B0-5812	0.397204	low	1.34211
TCGA-B2-4101	0.811375	low	1.10526
TCGA-B2-4102	0.362677	low	2.23684
TCGA-B2-5633	0.25885	low	1.57895
TCGA-B2-5635	0.286269	low	1.73684
TCGA-B2-5636	0.446994	low	0.552632
TCGA-B2-5641	0.692993	low	1.92105
TCGA-B4-5834	0.185858	low	1
TCGA-B4-5836	0.332189	low	2.13158
TCGA-B4-5843	0.241655	low	1.28947
TCGA-B4-5844	0.45699	low	1.73684
TCGA-B8-4146	0.44054	low	1.13158
TCGA-B8-4148	0.556804	low	0.973684
TCGA-B8-4621	0.620504	low	2.55263
TCGA-B8-5159	0.45567	low	1.55263
TCGA-B8-5162	0.681539	low	1.71053
TCGA-B8-5165	0.202439	low	0.526316
TCGA-B8-5545	0.265409	low	0.631579
TCGA-B8-5546	0.333432	low	0.368421
TCGA-B8-5549	0.408255	low	1.78947
TCGA-B8-5552	0.212346	low	0.710526
TCGA-B8-5553	0.317144	low	1.42105
TCGA-B8-A54E	0.611063	low	1.34211
TCGA-B8-A54F	0.501262	low	0.894737
TCGA-B8-A54I	0.836639	low	1.65789
TCGA-B8-A54K	0.245002	low	0.736842
TCGA-B8-A7U6	0.623196	low	1.44737
TCGA-B8-A8YJ	0.434212	low	0.0526316
TCGA-BP-4177	0.49486	low	0.421053
TCGA-BP-4760	0.424066	low	0.315789
TCGA-BP-4782	0.414615	low	2.18421
TCGA-BP-4795	0.453384	low	0.657895
TCGA-BP-4801	0.331343	low	1.63158
TCGA-BP-4961	0.234592	low	1.05263
TCGA-BP-4962	0.614588	low	0.921053
TCGA-BP-4963	0.729134	low	2.65789
TCGA-BP-4964	0.435577	low	2.07895
TCGA-BP-4965	0.303985	low	1.55263
TCGA-BP-4968	0.368953	low	1.18421
TCGA-BP-4975	0.33805	low	0.5
TCGA-BP-4976	0.506007	low	2.78947
TCGA-BP-4977	0.585346	low	1.36842
TCGA-BP-4982	0.384411	low	1.05263
TCGA-BP-4987	0.258212	low	0.710526
TCGA-BP-4991	0.324988	low	1.39474
TCGA-BP-4993	0.538432	low	1.47368
TCGA-BP-4995	0.593846	low	1.28947
TCGA-BP-4998	0.451855	low	1
TCGA-BP-4999	0.31825	low	1.36842
TCGA-BP-5000	0.539457	low	1.31579
TCGA-BP-5001	0.313349	low	0.973684
TCGA-BP-5004	0.460526	low	1.55263
TCGA-BP-5006	0.420362	low	1.10526
TCGA-BP-5007	0.550787	low	0.736842
TCGA-BP-5008	0.312272	low	0.973684
TCGA-BP-5168	0.589722	low	3.68421
TCGA-BP-5170	0.425801	low	1.36842
TCGA-BP-5173	0.684788	low	2.23684
TCGA-BP-5174	0.33097	low	1.15789
TCGA-BP-5175	0.792414	low	1.15789
TCGA-BP-5176	0.83434	low	3.55263
TCGA-BP-5177	0.45276	low	1.36842
TCGA-BP-5180	0.452919	low	1.31579
TCGA-BP-5181	0.286148	low	1.65789
TCGA-BP-5182	0.406862	low	2.07895
TCGA-BP-5184	0.373841	low	0.815789
TCGA-BP-5185	0.664165	low	2.36842
TCGA-BP-5186	0.290773	low	0.921053
TCGA-BP-5187	0.47423	low	1.55263
TCGA-BP-5189	0.788314	low	1.34211
TCGA-BP-5190	0.574662	low	1.26316
TCGA-BP-5192	0.323985	low	1.65789
TCGA-BP-5194	0.211183	low	0.710526
TCGA-BP-5195	0.584286	low	2
TCGA-CJ-4899	0.255503	low	0.921053
TCGA-CJ-4903	0.464965	low	1.36842
TCGA-CJ-4905	0.330569	low	1.73684
TCGA-CJ-4908	0.256253	low	0.868421
TCGA-CJ-4920	0.594543	low	4.13158
TCGA-CJ-5671	0.467937	low	1.73684
TCGA-CJ-5672	0.654864	low	2.84211
TCGA-CJ-5683	0.540331	low	1.89474
TCGA-CJ-5686	0.534751	low	1.92105
TCGA-CJ-6030	0.727645	low	3.10526
TCGA-CJ-6031	0.409771	low	1.84211
TCGA-CW-5581	0.290398	low	1.55263
TCGA-CW-5583	0.229164	low	0.736842
TCGA-CW-5588	0.389956	low	1.31579
TCGA-CW-5589	0.254172	low	1.5
TCGA-CW-6093	0.260986	low	3.26316
TCGA-CZ-4853	0.46349	low	3.42105
TCGA-CZ-4856	0.311978	low	1.47368
TCGA-CZ-4859	0.254863	low	2.97368
TCGA-CZ-4865	0.414254	low	2.57895
TCGA-CZ-4866	0.484014	low	2.5
TCGA-CZ-5453	0.576352	low	2.31579
TCGA-CZ-5458	0.747513	low	0.921053
TCGA-CZ-5463	0.795399	low	1.55263
TCGA-CZ-5469	0.816699	low	1.42105
TCGA-CZ-5982	0.400872	low	1.34211
TCGA-CZ-5984	0.447467	low	1.23684
TCGA-CZ-5986	0.418939	low	1.81579
TCGA-CZ-5988	0.22541	low	1.34211
TCGA-CZ-5989	0.576591	low	1.10526
TCGA-DV-5565	0.521705	low	1.78947
TCGA-DV-5566	0.662586	low	1.57895
TCGA-DV-5567	0.192677	low	0.368421
TCGA-DV-5568	0.177978	low	0.473684
TCGA-DV-5569	0.179933	low	0.289474
TCGA-DV-5573	0.389692	low	0.842105
TCGA-DV-5574	0.282019	low	0.315789
TCGA-DV-5575	0.333716	low	0.684211
TCGA-DV-5576	0.512128	low	0.0263158
TCGA-DV-A4VZ	0.713563	low	0.342105
TCGA-DV-A4W0	0.679849	low	1.94737
TCGA-EU-5904	0.167973	low	1.07895
TCGA-EU-5905	0.409389	low	1.71053
TCGA-EU-5906	0.248382	low	1.73684
TCGA-G6-A8L8	0.677344	low	2.42105
TCGA-MW-A4EC	0.501395	low	1.42105
TCGA-T7-A92I	0.14933	low	1
